# Supplementary material for: Development and validation of a nomogram with an autophagy-related gene signature for predicting survival in patients with glioblastoma
Source: Aging (Albany NY). 2019 Dec 17;11(24):12246–69. doi: 10.18632/aging.102566 (PMC6949068; doi:10.18632/aging.102566)
Supplement: Supplementary Table 2 [file aging-11-102566-s001..xlsx]

## Sheet: Supplementary Table 2
Supplementary Table 2. GSEA reports for high ITGA3, MAP1LC3A, and NRG1 expression groups in TCGA-GBM cohort.
GENE	NAME		SIZE	ES	NES	NOM p-val	FDR q-val	FWER p-val	RANK AT MAX	LEADING EDGE
ITGA3	KEGG_MAPK_SIGNALING_PATHWAY	*#	265	0.559443	2.13444	0	0.00274412	0.001	10979	tags=51%, list=23%, signal=66%
	KEGG_ENDOCYTOSIS	*	178	0.61856	2.08564	0	0.00269347	0.002	8720	tags=57%, list=18%, signal=69%
	KEGG_INSULIN_SIGNALING_PATHWAY	*	137	0.653981	2.03901	0	0.000907684	0.004	7339	tags=53%, list=15%, signal=63%
	KEGG_LYSOSOME	*	119	0.722933	1.99122	0	0.00119798	0.012	8857	tags=74%, list=19%, signal=91%
	KEGG_MTOR_SIGNALING_PATHWAY	*#	52	0.64917	1.97404	0	0.00290017	0.014	10484	tags=62%, list=22%, signal=79%
	KEGG_REGULATION_OF_AUTOPHAGY	*	35	0.51511	1.91866	0.0472897	0.103148	0.032	18664	tags=71%, list=39%, signal=117%
	KEGG_PATHWAYS_IN_CANCER	#	324	0.583056	1.90974	0	0.00122289	0.034	11271	tags=52%, list=24%, signal=68%
	KEGG_CYTOKINE_CYTOKINE_RECEPTOR_INTERACTION	#	258	0.532752	1.90763	0.045283	0.0161457	0.034	9744	tags=44%, list=20%, signal=55%
	KEGG_FOCAL_ADHESION	#	199	0.658387	1.89575	0	0.000399123	0.039	6633	tags=53%, list=14%, signal=61%
	KEGG_CALCIUM_SIGNALING_PATHWAY	#	176	0.422733	1.89429	0.078629	0.0745168	0.041	9142	tags=35%, list=19%, signal=43%
	KEGG_JAK_STAT_SIGNALING_PATHWAY	#	151	0.575236	1.89182	0.00185874	0.00347348	0.045	11634	tags=54%, list=24%, signal=72%
	KEGG_WNT_SIGNALING_PATHWAY	#	149	0.503381	1.86851	0.0155642	0.0311752	0.059	10908	tags=41%, list=23%, signal=53%
	KEGG_CELL_CYCLE	#	124	0.468046	1.86574	0.228682	0.122749	0.061	15677	tags=50%, list=33%, signal=74%
	KEGG_APOPTOSIS	#	86	0.723277	1.83082	0	0	0.092	8909	tags=69%, list=19%, signal=84%
	KEGG_TGF_BETA_SIGNALING_PATHWAY	#	85	0.51283	1.71848	0.0193798	0.0348544	0.247	13687	tags=56%, list=29%, signal=79%
	KEGG_ECM_RECEPTOR_INTERACTION	#	84	0.596333	1.68389	0.023166	0.0127457	0.306	7362	tags=43%, list=15%, signal=51%
	KEGG_VEGF_SIGNALING_PATHWAY	#	75	0.61697	1.59643	0	0.00231175	0.443	9454	tags=53%, list=20%, signal=66%
	KEGG_ADHERENS_JUNCTION	#	73	0.680756	1.58088	0	0.00256607	0.462	6585	tags=53%, list=14%, signal=62%
	KEGG_PPAR_SIGNALING_PATHWAY	#	69	0.567207	1.52663	0.00189036	0.00368919	0.562	6425	tags=41%, list=13%, signal=47%
	KEGG_P53_SIGNALING_PATHWAY	#	67	0.58843	1.44576	0	0.00476553	0.677	6621	tags=37%, list=14%, signal=43%
	KEGG_GLIOMA	#	65	0.617611	1.38231	0.00194553	0.00263757	0.749	9826	tags=55%, list=21%, signal=70%
	KEGG_HEDGEHOG_SIGNALING_PATHWAY	#	56	0.391302	1.34351	0.188931	0.170289	0.776	11103	tags=30%, list=23%, signal=40%
	KEGG_NOTCH_SIGNALING_PATHWAY	#	47	0.564575	1.26197	0.0494071	0.0471289	0.848	9723	tags=51%, list=20%, signal=64%
MAP1LC3A	KEGG_MAPK_SIGNALING_PATHWAY	*#	265	0.552327	1.90711	0	0.0210766	0.043	13789	tags=60%, list=29%, signal=84%
	KEGG_ENDOCYTOSIS	*	178	0.579756	1.86572	0.0040568	0.0243248	0.069	14881	tags=70%, list=31%, signal=102%
	KEGG_INSULIN_SIGNALING_PATHWAY	*	137	0.550606	1.81845	0.00994036	0.0319376	0.108	14286	tags=61%, list=30%, signal=86%
	KEGG_LYSOSOME	*	119	0.58702	1.79508	0.038	0.0457752	0.127	11390	tags=61%, list=24%, signal=80%
	KEGG_MTOR_SIGNALING_PATHWAY	*#	52	0.507139	1.79444	0.0384507	0.0774731	0.128	13674	tags=56%, list=29%, signal=78%
	KEGG_REGULATION_OF_AUTOPHAGY	*	35	0.515204	1.75144	0.037771	0.119091	0.18	7495	tags=40%, list=16%, signal=47%
	KEGG_PATHWAYS_IN_CANCER	#	324	0.443643	1.66176	0.0327383	0.0654359	0.319	14337	tags=45%, list=30%, signal=64%
	KEGG_CYTOKINE_CYTOKINE_RECEPTOR_INTERACTION	#	258	0.393674	1.65398	0.23444	0.180061	0.328	19895	tags=53%, list=42%, signal=90%
	KEGG_FOCAL_ADHESION	#	199	0.452572	1.63029	0.0806452	0.0732932	0.366	15245	tags=49%, list=32%, signal=72%
	KEGG_CALCIUM_SIGNALING_PATHWAY	#	176	0.493075	1.62241	0.035124	0.0513124	0.375	14962	tags=53%, list=31%, signal=78%
	KEGG_JAK_STAT_SIGNALING_PATHWAY	#	151	0.438639	1.61576	0.114519	0.0923136	0.382	19984	tags=62%, list=42%, signal=107%
	KEGG_WNT_SIGNALING_PATHWAY	#	149	0.469292	1.60199	0.0521042	0.0656115	0.413	14793	tags=50%, list=31%, signal=73%
	KEGG_CELL_CYCLE	#	124	0.490969	1.52467	0.171079	0.115147	0.553	13424	tags=44%, list=28%, signal=60%
	KEGG_APOPTOSIS	#	86	0.642643	1.52034	0	0.0153255	0.561	9251	tags=59%, list=19%, signal=73%
	KEGG_TGF_BETA_SIGNALING_PATHWAY	#	85	0.423469	1.48016	0.145749	0.125675	0.622	16292	tags=48%, list=34%, signal=73%
	KEGG_ECM_RECEPTOR_INTERACTION	#	84	0.28004	1.46797	0.668687	0.57034	0.638	15894	tags=35%, list=33%, signal=52%
	KEGG_VEGF_SIGNALING_PATHWAY	#	75	0.573213	1.41896	0.00402414	0.0230681	0.701	12335	tags=53%, list=26%, signal=72%
	KEGG_ADHERENS_JUNCTION	#	73	0.553252	1.36617	0.0420842	0.050634	0.753	12391	tags=53%, list=26%, signal=72%
	KEGG_PPAR_SIGNALING_PATHWAY	#	69	0.514367	1.35482	0.0120968	0.0455302	0.762	11435	tags=45%, list=24%, signal=59%
	KEGG_P53_SIGNALING_PATHWAY	#	67	0.519159	1.33833	0.0357143	0.0518835	0.775	8446	tags=36%, list=18%, signal=43%
	KEGG_GLIOMA	#	65	0.517266	1.24378	0.0414201	0.0523559	0.838	12704	tags=49%, list=27%, signal=67%
	KEGG_HEDGEHOG_SIGNALING_PATHWAY	#	56	0.353695	1.13221	0.312245	0.258451	0.904	13793	tags=39%, list=29%, signal=55%
	KEGG_NOTCH_SIGNALING_PATHWAY	#	47	0.635754	0.815103	0.00988142	0.0239074	0.99	9290	tags=53%, list=19%, signal=66%
NRG1	KEGG_MAPK_SIGNALING_PATHWAY	*#	265	0.447668	1.59612	0.0491803	0.732545	0.476	16787	tags=58%, list=35%, signal=89%
	KEGG_ENDOCYTOSIS	*	178	0.470136	1.53238	0.0828283	0.567448	0.571	15424	tags=56%, list=32%, signal=82%
	KEGG_INSULIN_SIGNALING_PATHWAY	*	137	0.404076	1.50491	0.205128	0.336239	0.617	17493	tags=53%, list=37%, signal=83%
	KEGG_LYSOSOME	*	119	0.531668	1.49604	0.0995851	0.559785	0.628	13266	tags=60%, list=28%, signal=82%
	KEGG_MTOR_SIGNALING_PATHWAY	*#	52	0.47018	1.4652	0.0141372	0.347966	0.673	17845	tags=65%, list=37%, signal=104%
	KEGG_REGULATION_OF_AUTOPHAGY	*	35	0.42717	1.45683	0.0290581	0.3522	0.68	21991	tags=77%, list=46%, signal=143%
	KEGG_PATHWAYS_IN_CANCER	#	324	0.35377	1.39969	0.0247951	0.35282	0.755	20939	tags=54%, list=44%, signal=96%
	KEGG_CYTOKINE_CYTOKINE_RECEPTOR_INTERACTION	#	258	0.449974	1.39551	0.127451	0.347334	0.759	10231	tags=45%, list=21%, signal=57%
	KEGG_FOCAL_ADHESION	#	199	0.32327	1.3938	0.390756	0.404521	0.759	7100	tags=21%, list=15%, signal=25%
	KEGG_CALCIUM_SIGNALING_PATHWAY	#	176	0.492226	1.38091	0.0434783	1	0.767	10989	tags=47%, list=23%, signal=60%
	KEGG_JAK_STAT_SIGNALING_PATHWAY	#	151	0.417599	1.28907	0.104839	0.328298	0.847	17252	tags=57%, list=36%, signal=89%
	KEGG_WNT_SIGNALING_PATHWAY	#	149	0.374345	1.27471	0.260417	0.351393	0.865	20514	tags=54%, list=43%, signal=95%
	KEGG_CELL_CYCLE	#	124	0.328592	1.27358	0.567288	0.502034	0.865	23393	tags=56%, list=49%, signal=111%
	KEGG_APOPTOSIS	#	86	0.483802	1.22014	0.0862423	0.444975	0.897	9313	tags=44%, list=20%, signal=55%
	KEGG_TGF_BETA_SIGNALING_PATHWAY	#	85	0.400486	1.21553	0.193684	0.325482	0.9	20514	tags=60%, list=43%, signal=105%
	KEGG_ECM_RECEPTOR_INTERACTION	#	84	0.240046	1.18495	0.814889	0.757512	0.913	17502	tags=32%, list=37%, signal=51%
	KEGG_VEGF_SIGNALING_PATHWAY	#	75	0.399471	1.15644	0.204593	0.340121	0.922	20198	tags=63%, list=42%, signal=109%
	KEGG_ADHERENS_JUNCTION	#	73	0.362535	1.06394	0.42161	0.402073	0.955	26039	tags=71%, list=55%, signal=157%
	KEGG_PPAR_SIGNALING_PATHWAY	#	69	0.446186	1.05643	0.0696202	0.445226	0.957	17293	tags=59%, list=36%, signal=93%
	KEGG_P53_SIGNALING_PATHWAY	#	67	0.432525	1.05323	0.115789	0.342717	0.959	16078	tags=51%, list=34%, signal=76%
	KEGG_GLIOMA	#	65	0.381716	0.974155	0.0270378	0.345909	0.98	18997	tags=54%, list=40%, signal=89%
	KEGG_HEDGEHOG_SIGNALING_PATHWAY	#	56	0.330408	0.922246	0.397938	0.400841	0.989	16787	tags=45%, list=35%, signal=69%
	KEGG_NOTCH_SIGNALING_PATHWAY	#	47	0.353223	0.688912	0.51	0.457859	0.999	26352	tags=79%, list=55%, signal=176%
*	Regulation of Autophagy and autophagy-related KEGG pathways
#	Pathways in Cancer and their related KEGG pathways
ES, enrichment score; NES, normalized enrichment score; NOM P-val, nominal P value; FDR, false discovery rate.
