# Supplementary material for: Development and validation of a nomogram with an autophagy-related gene signature for predicting survival in patients with glioblastoma
Source: Aging (Albany NY). 2019 Dec 17;11(24):12246–69. doi: 10.18632/aging.102566 (PMC6949068; doi:10.18632/aging.102566)
Supplement: Supplementary Table 3 [file aging-11-102566-s002..xlsx]

## Sheet: Supplementary Table 3
Supplementary Table 3. GSEA reports for ATG-based high-risk and low-risk group in TCGA-GBM cohort.
RISK GROUP	NAME		SIZE	ES	NES	NOM p-val	FDR q-val	FWER p-val	RANK AT MAX	LEADING EDGE
High-Risk	KEGG_LYSOSOME	*	119	0.306412	1.04592	0.581053	1	0.961	9817	tags=33%, list=21%, signal=41%
High-Risk	KEGG_CYTOKINE_CYTOKINE_RECEPTOR_INTERACTION	#	258	0.320442	1.01415	0.414938	1	0.972	9432	tags=35%, list=20%, signal=44%
High-Risk	KEGG_FOCAL_ADHESION	#	199	0.27681	0.942768	0.518124	1	0.987	6697	tags=24%, list=14%, signal=27%
High-Risk	KEGG_JAK_STAT_SIGNALING_PATHWAY	#	151	0.258328	0.937382	0.6	1	0.988	9432	tags=30%, list=20%, signal=37%
High-Risk	KEGG_APOPTOSIS	#	86	0.310768	0.894565	0.54334	1	0.994	11960	tags=37%, list=25%, signal=50%
High-Risk	KEGG_ECM_RECEPTOR_INTERACTION	#	84	0.334584	0.877066	0.443515	1	0.994	4428	tags=23%, list=9%, signal=25%
High-Risk	KEGG_ADHERENS_JUNCTION	#	73	0.230449	0.765428	0.797495	0.996089	0.999	9119	tags=27%, list=19%, signal=34%
High-Risk	KEGG_P53_SIGNALING_PATHWAY	#	67	0.237721	0.683041	0.737288	1	1	8343	tags=25%, list=17%, signal=31%
Low-Risk	KEGG_MAPK_SIGNALING_PATHWAY	*#	265	-0.191087	-0.940702	0.851024	1	0.989	10633	tags=24%, list=22%, signal=30%
Low-Risk	KEGG_ENDOCYTOSIS	*	178	-0.164328	-0.879744	0.949248	1	0.994	12925	tags=26%, list=27%, signal=35%
Low-Risk	KEGG_INSULIN_SIGNALING_PATHWAY	*	137	-0.180897	-0.849149	0.910646	1	0.995	11271	tags=23%, list=24%, signal=30%
Low-Risk	KEGG_MTOR_SIGNALING_PATHWAY	*#	52	-0.267052	-0.776284	0.736059	1	0.999	9970	tags=27%, list=21%, signal=34%
Low-Risk	KEGG_REGULATION_OF_AUTOPHAGY	*	35	-0.314361	-0.715066	0.722736	1	1	12520	tags=40%, list=26%, signal=54%
Low-Risk	KEGG_PATHWAYS_IN_CANCER	#	324	-0.129553	-0.697503	0.998103	1	1	14779	tags=27%, list=31%, signal=40%
Low-Risk	KEGG_CALCIUM_SIGNALING_PATHWAY	#	176	-0.279908	-0.679676	0.519626	1	1	14621	tags=35%, list=31%, signal=50%
Low-Risk	KEGG_WNT_SIGNALING_PATHWAY	#	149	-0.274632	-0.660064	0.626866	1	1	14653	tags=39%, list=31%, signal=56%
Low-Risk	KEGG_CELL_CYCLE	#	124	-0.255837	-0.654324	0.774379	1	1	16027	tags=43%, list=34%, signal=64%
Low-Risk	KEGG_TGF_BETA_SIGNALING_PATHWAY	#	85	-0.166319	-0.573071	0.973635	1	1	10778	tags=22%, list=23%, signal=29%
Low-Risk	KEGG_VEGF_SIGNALING_PATHWAY	#	75	-0.205713	-0.560761	0.867159	1	1	11288	tags=24%, list=24%, signal=31%
Low-Risk	KEGG_PPAR_SIGNALING_PATHWAY	#	69	-0.211823	-0.520884	0.841035	1	1	11541	tags=28%, list=24%, signal=36%
Low-Risk	KEGG_GLIOMA	#	65	-0.190575	-0.505999	0.926499	1	1	14416	tags=29%, list=30%, signal=42%
Low-Risk	KEGG_HEDGEHOG_SIGNALING_PATHWAY	#	56	-0.210266	-0.475921	0.895221	1	1	17155	tags=41%, list=36%, signal=64%
Low-Risk	KEGG_NOTCH_SIGNALING_PATHWAY	#	47	-0.177534	-0.441335	0.948473	1	1	16104	tags=36%, list=34%, signal=55%
*	Regulation of Autophagy and autophagy-related KEGG pathways
#	Pathways in Cancer and their related KEGG pathways
ATG, autophagy-related gene; ES, enrichment score; NES, normalized enrichment score; NOM P-val, nominal P value; FDR, false discovery rate.
